# Supplementary material
Source: PubMed Central journal article supplement (PMC8477751)
Supplement: NIHMS1741640-supplement-1.pdf [file NIHMS1741640-supplement-1.pdf]

**Supplementary Table S1.** Factor loadings for health behaviors among NIH-AARP participants.

|                         | Movement    | Abstinence  | Weight control | Other       |
|-------------------------|-------------|-------------|----------------|-------------|
| Never smoked            | 0.41        | <b>0.57</b> | -0.10          | 0.24        |
| Healthy BMI             | 0.46        | -0.11       | <b>0.53</b>    | -0.26       |
| High F&V consumption    | 0.46        | -0.01       | <b>0.55</b>    | -0.24       |
| High physical activity  | <b>0.56</b> | -0.30       | 0.24           | -0.30       |
| Low alcohol consumption | 0.19        | <b>0.70</b> | 0.09           | 0.17        |
| 7+ hrs sleep/night      | 0.19        | -0.39       | -0.33          | <b>0.57</b> |
| Low TV watching         | <b>0.52</b> | -0.01       | -0.31          | 0.03        |
| All recent screenings   | 0.24        | -0.26       | 0.44           | <b>0.60</b> |

*Note.* Bolded factor loadings indicate the factor on which each behavior loaded most strongly (i.e., the factor to which the behavior belongs). BMI=body mass index; F&V=fruit and vegetable; hrs=hours; TV=television.

**Supplementary Table S2.** Poisson regressions examining the association between neighborhood poverty or education quintile and scores on revised health behavior factors, controlling for demographic characteristics, among NIH-AARP participants.

|                            | ACS behaviors |             | Eight-point index |             |
|----------------------------|---------------|-------------|-------------------|-------------|
|                            | RR            | 95% CI      | RR                | 95% CI      |
| <b>Poverty quintiles</b>   |               |             |                   |             |
| 1 (least deprived)         |               | (ref)       |                   | (ref)       |
| 2                          | 1.00          | (0.99-1.01) | 0.99              | (0.99-1.00) |
| 3                          | 0.99          | (0.99-1.00) | 0.98              | (0.97-0.98) |
| 4                          | 0.99          | (0.98-1.00) | 0.97              | (0.96-0.97) |
| 5 (most deprived)          | 0.98          | (0.97-0.98) | 0.95              | (0.95-0.96) |
| <b>Education quintiles</b> |               |             |                   |             |
| 1 (least deprived)         |               | (ref)       |                   | (ref)       |
| 2                          | 0.98          | (0.97-0.99) | 0.97              | (0.96-0.97) |
| 3                          | 0.97          | (0.96-0.97) | 0.95              | (0.94-0.95) |
| 4                          | 0.96          | (0.95-0.96) | 0.93              | (0.92-0.94) |
| 5 (most deprived)          | 0.95          | (0.94-0.96) | 0.92              | (0.92-0.93) |

*Note.* Each column in each panel represents one multivariable model controlling for participant sex, age group, race/ethnicity, marital status, educational attainment, and self-reported health status. ACS=American Cancer Society; RR=relative risk; CI=confidence interval; ref=reference category.

**Supplementary Table S3.** Poisson regressions examining the association between neighborhood poverty and education quintile and scores on health behavior factors, controlling for demographic characteristics, among NIH-AARP participants.

|                                                  | Movement |             | Abstinence |             | Weight control |             | Other |             | ACS behaviors |             |
|--------------------------------------------------|----------|-------------|------------|-------------|----------------|-------------|-------|-------------|---------------|-------------|
|                                                  | RR       | 95% CI      | RR         | 95% CI      | RR             | 95% CI      | RR    | 95% CI      | RR            | 95% CI      |
| <b><i>Neighborhood-level characteristics</i></b> |          |             |            |             |                |             |       |             |               |             |
| Poverty quintiles                                |          |             |            |             |                |             |       |             |               |             |
| 1 (least deprived)                               |          | (ref)       |            | (ref)       |                | (ref)       |       | (ref)       |               | (ref)       |
| 2                                                | 1.01     | (1.00-1.02) | 0.99       | (0.98-1.00) | 1.00           | (0.99-1.01) | 1.00  | (0.99-1.01) | 1.01          | (1.00-1.01) |
| 3                                                | 1.01     | (0.99-1.02) | 0.98       | (0.97-0.99) | 0.99           | (0.98-1.01) | 1.00  | (0.99-1.01) | 1.01          | (1.00-1.01) |
| 4                                                | 1.01     | (1.00-1.02) | 0.97       | (0.96-0.98) | 1.00           | (0.99-1.01) | 1.00  | (0.99-1.01) | 1.01          | (1.00-1.02) |
| 5 (most deprived)                                | 1.01     | (1.00-1.02) | 0.97       | (0.96-0.98) | 0.99           | (0.97-1.00) | 0.99  | (0.98-1.00) | 1.00          | (0.99-1.01) |
| Education quintiles                              |          |             |            |             |                |             |       |             |               |             |
| 1 (least deprived)                               |          | (ref)       |            | (ref)       |                | (ref)       |       | (ref)       |               | (ref)       |
| 2                                                | 0.94     | (0.92-0.95) | 1.00       | (0.99-1.01) | 0.96           | (0.94-0.97) | 0.97  | (0.96-0.98) | 0.98          | (0.97-0.98) |
| 3                                                | 0.90     | (0.89-0.91) | 1.00       | (0.99-1.01) | 0.93           | (0.92-0.94) | 0.95  | (0.94-0.95) | 0.97          | (0.96-0.97) |
| 4                                                | 0.88     | (0.87-0.89) | 1.00       | (0.99-1.01) | 0.91           | (0.90-0.92) | 0.92  | (0.91-0.93) | 0.96          | (0.95-0.96) |
| 5 (most deprived)                                | 0.87     | (0.86-0.89) | 1.01       | (1.00-1.03) | 0.90           | (0.88-0.91) | 0.90  | (0.89-0.91) | 0.95          | (0.94-0.96) |
| <b><i>Individual-level characteristics</i></b>   |          |             |            |             |                |             |       |             |               |             |
| Sex                                              |          |             |            |             |                |             |       |             |               |             |
| Male                                             |          | (ref)       |            | (ref)       |                | (ref)       |       | (ref)       |               | (ref)       |
| Female                                           | 0.94     | (0.94-0.95) | 1.25       | (1.25-1.26) | 1.21           | (1.20-1.22) | 0.94  | (0.94-0.95) | 1.10          | (1.10-1.11) |
| Age group                                        |          |             |            |             |                |             |       |             |               |             |
| <65 years                                        |          | (ref)       |            | (ref)       |                | (ref)       |       | (ref)       |               | (ref)       |
| 65+ years                                        | 0.99     | (0.98-1.00) | 1.00       | (0.99-1.01) | 1.09           | (1.08-1.10) | 1.08  | (1.08-1.09) | 1.07          | (1.06-1.07) |
| Race/ethnicity                                   |          |             |            |             |                |             |       |             |               |             |
| Non-Hispanic white                               |          | (ref)       |            | (ref)       |                | (ref)       |       | (ref)       |               | (ref)       |
| Other                                            | 0.96     | (0.95-0.98) | 1.06       | (1.05-1.08) | 0.99           | (0.98-1.01) | 0.88  | (0.87-0.89) | 1.02          | (1.01-1.03) |
| Marital status                                   |          |             |            |             |                |             |       |             |               |             |
| Married/living as married                        |          | (ref)       |            | (ref)       |                | (ref)       |       | (ref)       |               | (ref)       |
| Other                                            | 0.94     | (0.93-0.95) | 0.95       | (0.94-0.95) | 0.97           | (0.96-0.98) | 0.91  | (0.90-0.91) | 0.96          | (0.95-0.97) |
| Education                                        |          |             |            |             |                |             |       |             |               |             |
| High school degree or less                       |          | (ref)       |            | (ref)       |                | (ref)       |       | (ref)       |               | (ref)       |

|                             |      |             |      |             |      |             |      |             |      |             |
|-----------------------------|------|-------------|------|-------------|------|-------------|------|-------------|------|-------------|
| More than high school       | 1.25 | (1.24-1.26) | 1.03 | (1.02-1.03) | 1.10 | (1.09-1.11) | 1.10 | (1.09-1.11) | 1.05 | (1.05-1.06) |
| Self-reported health status |      |             |      |             |      |             |      |             |      |             |
| Less than very good         |      | (ref)       |
| Excellent or very good      | 1.40 | (1.39-1.41) | 1.04 | (1.03-1.04) | 1.24 | (1.23-1.25) | 1.04 | (1.03-1.04) | 1.16 | (1.15-1.17) |

*Note.* Each column represents one multivariable model. RR=relative risk; ref=reference category. \* $p<.05$ ; \*\* $p<.01$ ; \*\*\* $p<.001$ .
